# Supplementary material
Source: publisher figshare collection journal article supplement (https://acs.figshare.com/ndownloader/files/14109791)
Supplement: Supplementary file 1 [file 14109791]

Supporting Information for:

# Sustainable approach for Cellulose aerogel preparation from the DBU-CO<sub>2</sub> Switchable Solvent

*Kelechukwu N. Onwukamike,<sup>a,b</sup> Laurine Lapuyade,<sup>c</sup> Laurence Maillé,<sup>c</sup> Stéphane Grelier,<sup>b</sup>*

*Etienne Grau,<sup>b</sup> Henri Cramail,<sup>b\*</sup> Michael A.R. Meier<sup>a\*</sup>*

<sup>a</sup> Institute of Organic Chemistry (IOC), Materialwissenschaftliches Zentrum (MZE), Karlsruhe Institute of Technology (KIT), Straße am Forum 7, 76131 Karlsruhe, Germany

<sup>b</sup> Laboratoire de Chimie des Polymères Organiques, Université de Bordeaux, UMR5629, CNRS - Bordeaux INP - ENSCBP, 16 Avenue Pey-Berland, 33607 Pessac Cedex France

<sup>c</sup> Laboratoire des Composites Thermostructuraux (LCTS),  
Université de Bordeaux-CNRS-Safran-CEA, UMR 5801, 3 Allée de La Boétie, 33600 Pessac, France

|                                                                                                             |     |
|-------------------------------------------------------------------------------------------------------------|-----|
| <b>I:</b> Effect of coagulating solvent and super base on apparent density of cellulose aerogel.....        | S2  |
| <b>II:</b> Morphology studies of cellulose aerogels <i>via</i> SEM under various processing conditions..... | S3  |
| <b>III:</b> Effect of coagulating solvent and super base on pore size of cellulose aerogel.....             | S7  |
| <b>IV:</b> FT-IR spectra comparison between native MCC and cellulose aerogel.....                           | S10 |
| <b>V:</b> FT-IR spectra comparison between pure and recovered DBU and DMSO.....                             | S11 |

**Number of pages:** 12

**Number of figures:** 16

**I. Effect of coagulating solvent and super base on apparent density of cellulose aerogel**

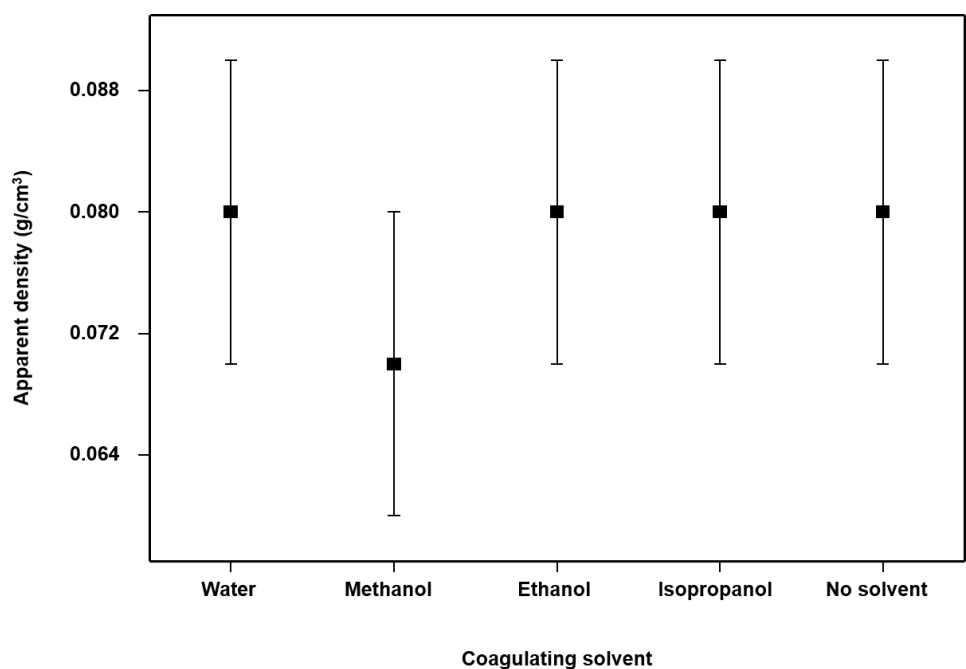

**Figure SI 1:** Effect of coagulating solvent on the apparent density of cellulose aerogel using 5 wt.% MC and DBU as a super base.

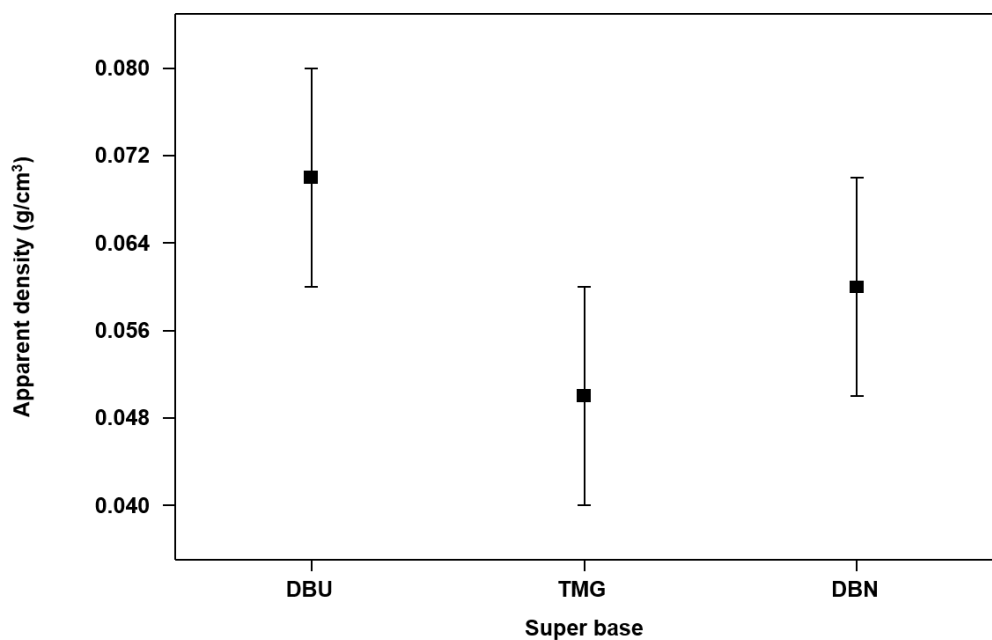

**Figure SI 2:** Effect of the super base on the apparent density of cellulose aerogel using 5 wt.% MCC and methanol coagulation.

## II. Morphology studies *via* SEM of cellulose aerogels under various processing conditions

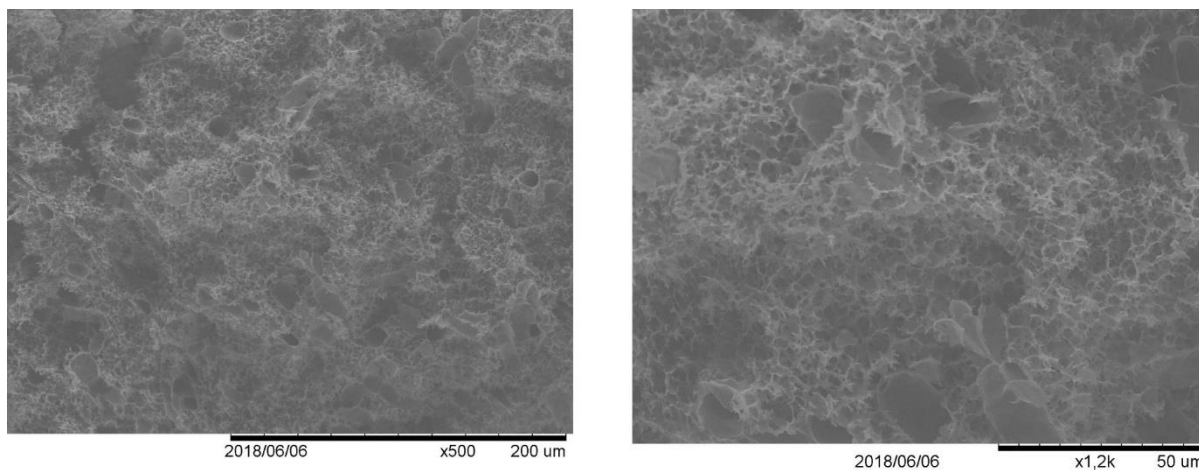

**Figure SI 3:** SEM image of cellulose aerogel from freeze-drying (using 7 wt.% MCC, DBU as a super base and water coagulation).

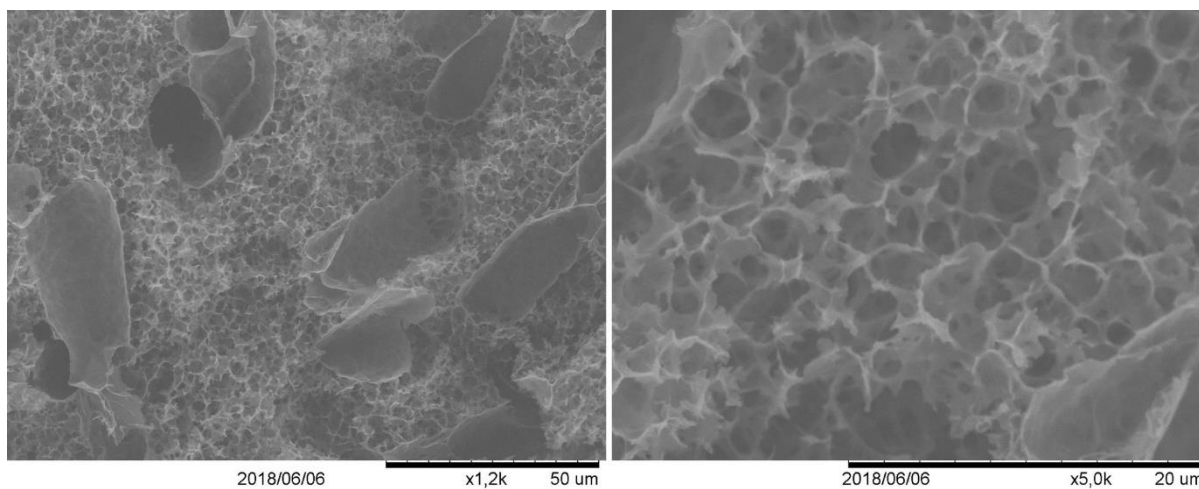

**Figure SI 4:** SEM image of cellulose aerogel from freeze-drying (using 10 wt.% MCC, DBU as super base and water coagulation).

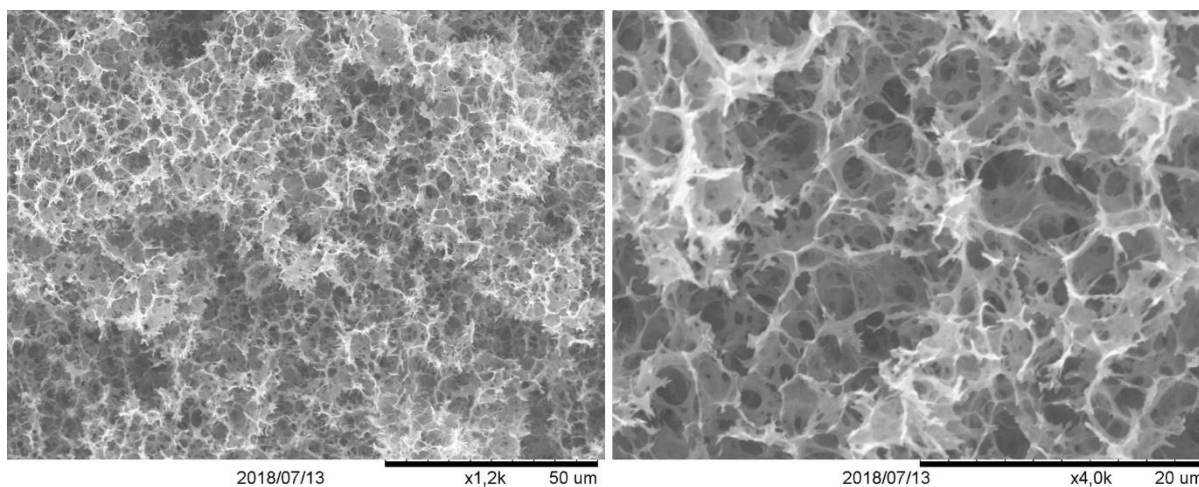

**Figure SI 5:** SEM image of cellulose aerogel from freeze-drying (using 7 wt.% MCC, DBU as super base and methanol coagulation).

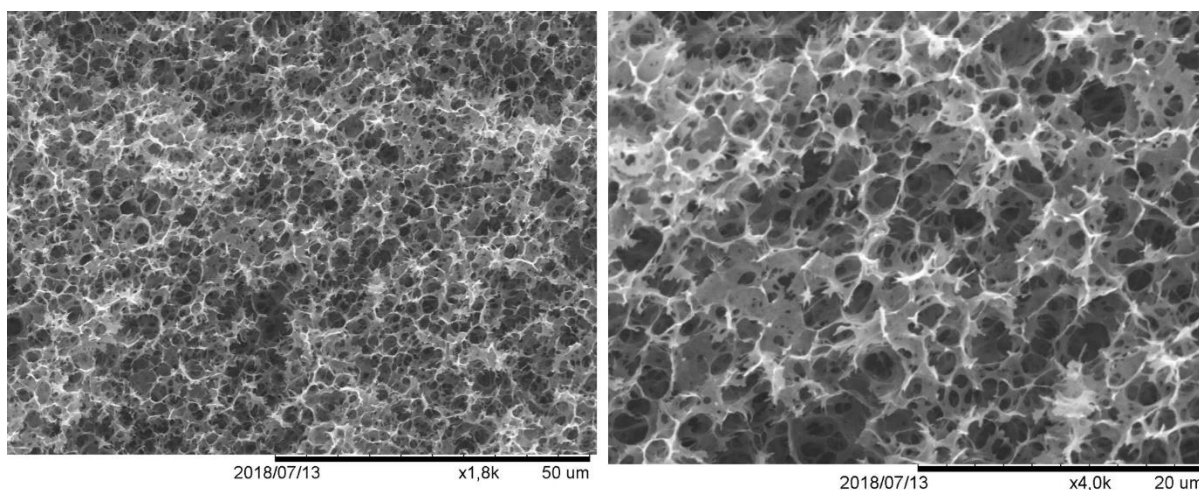

**Figure SI 6:** SEM image of cellulose aerogel from freeze-drying (using 10 wt.% MCC, DBU as super base and methanol coagulation).

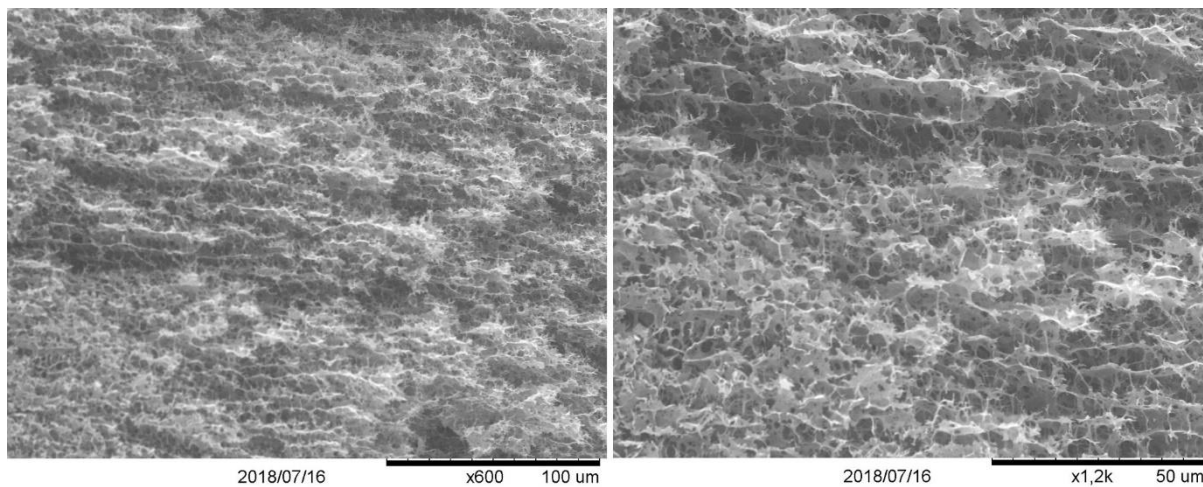

**Figure SI 7:** SEM image of cellulose aerogel from freeze-drying (using 5 wt.% MCC, TMG as super base and methanol coagulation).

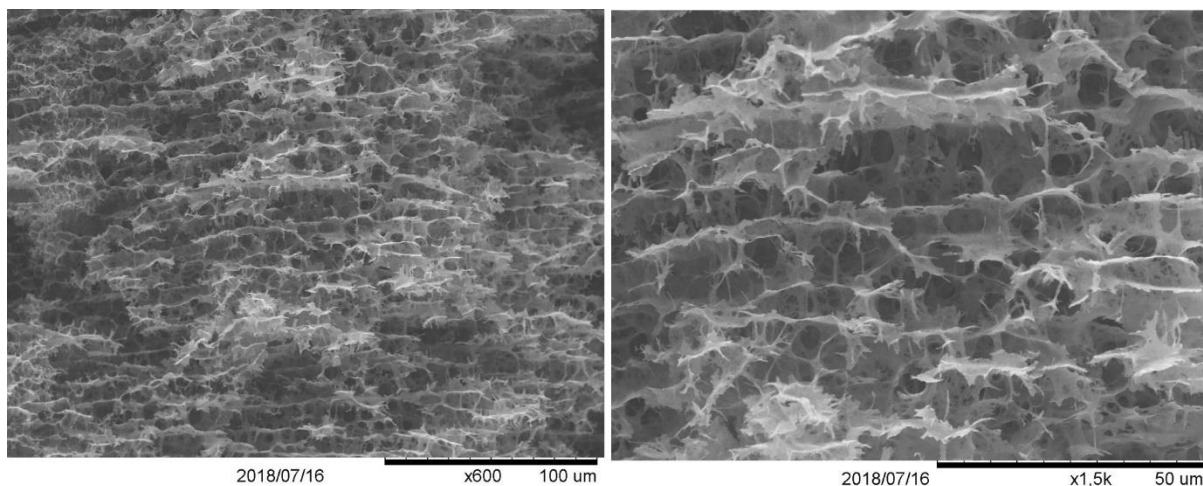

**Figure SI 8:** SEM image of cellulose aerogel from freeze-drying (using 5 wt.% MCC, DBN as super base and methanol coagulation).

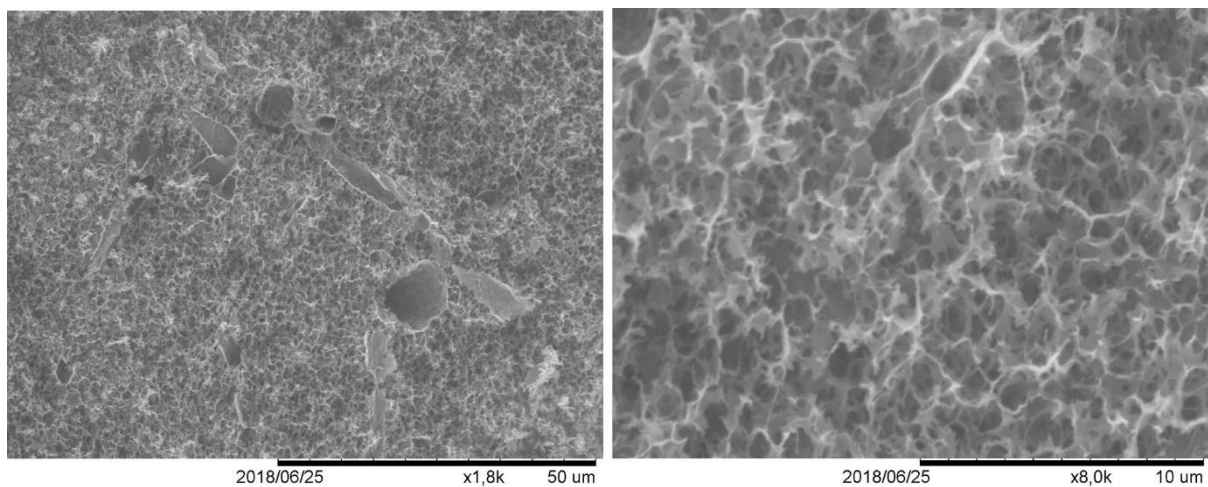

**Figure SI 9:** SEM image of cellulose aerogel from freeze-drying (using 3 wt.% CP, DBU as super base and water coagulation).

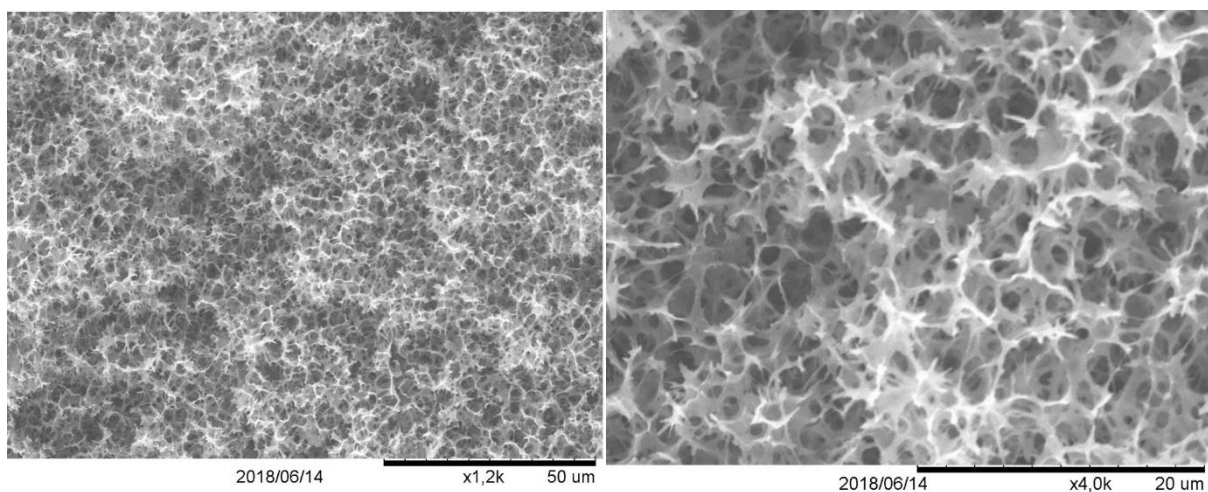

**Figure SI 10:** SEM image of cellulose aerogel from freeze-drying (using 3 wt.% CP, DBU as super base and ethanol coagulation).

### III. Effect of coagulating solvent and super base on pore size of cellulose aerogel

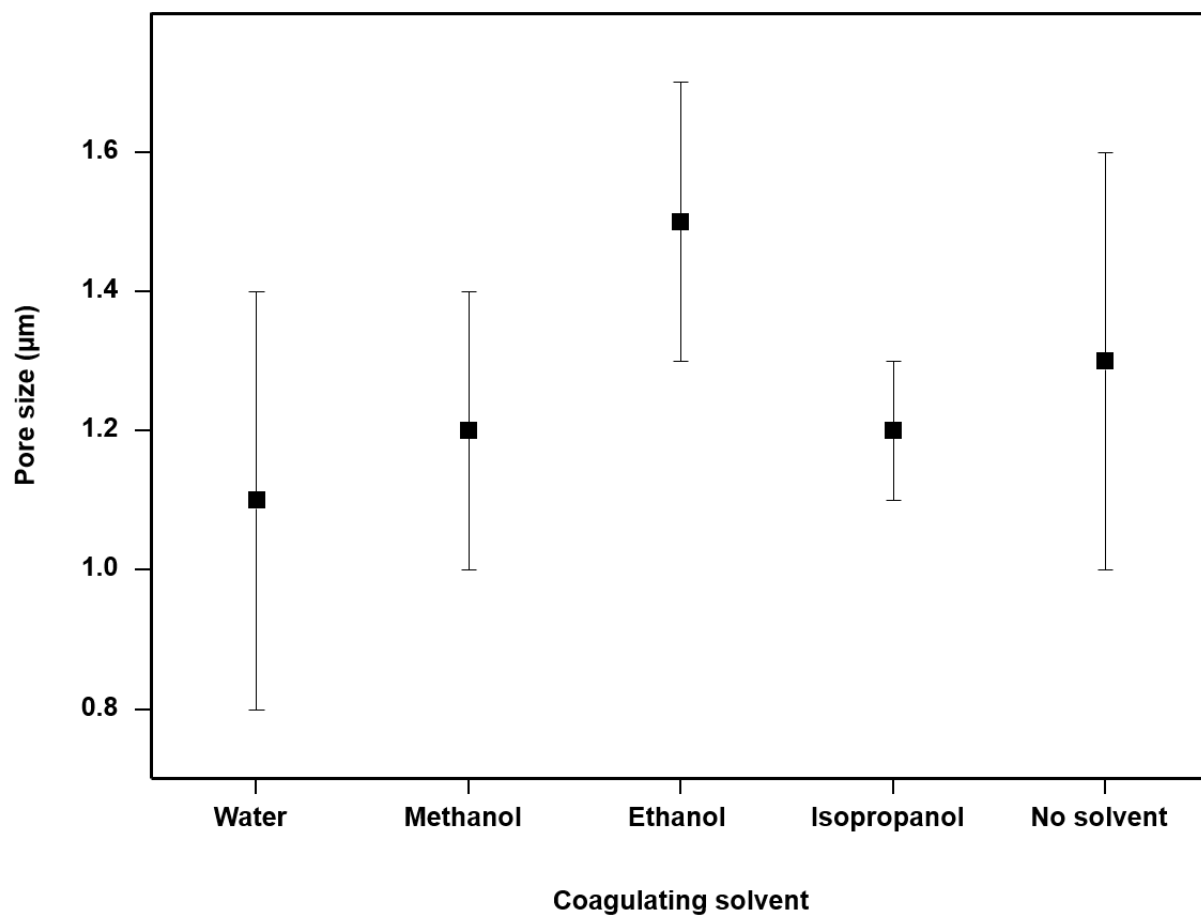

**Figure SI 11:** Effect of coagulating solvent on the pore size of cellulose aerogel using 5 wt.% MC and DBU as a super base.

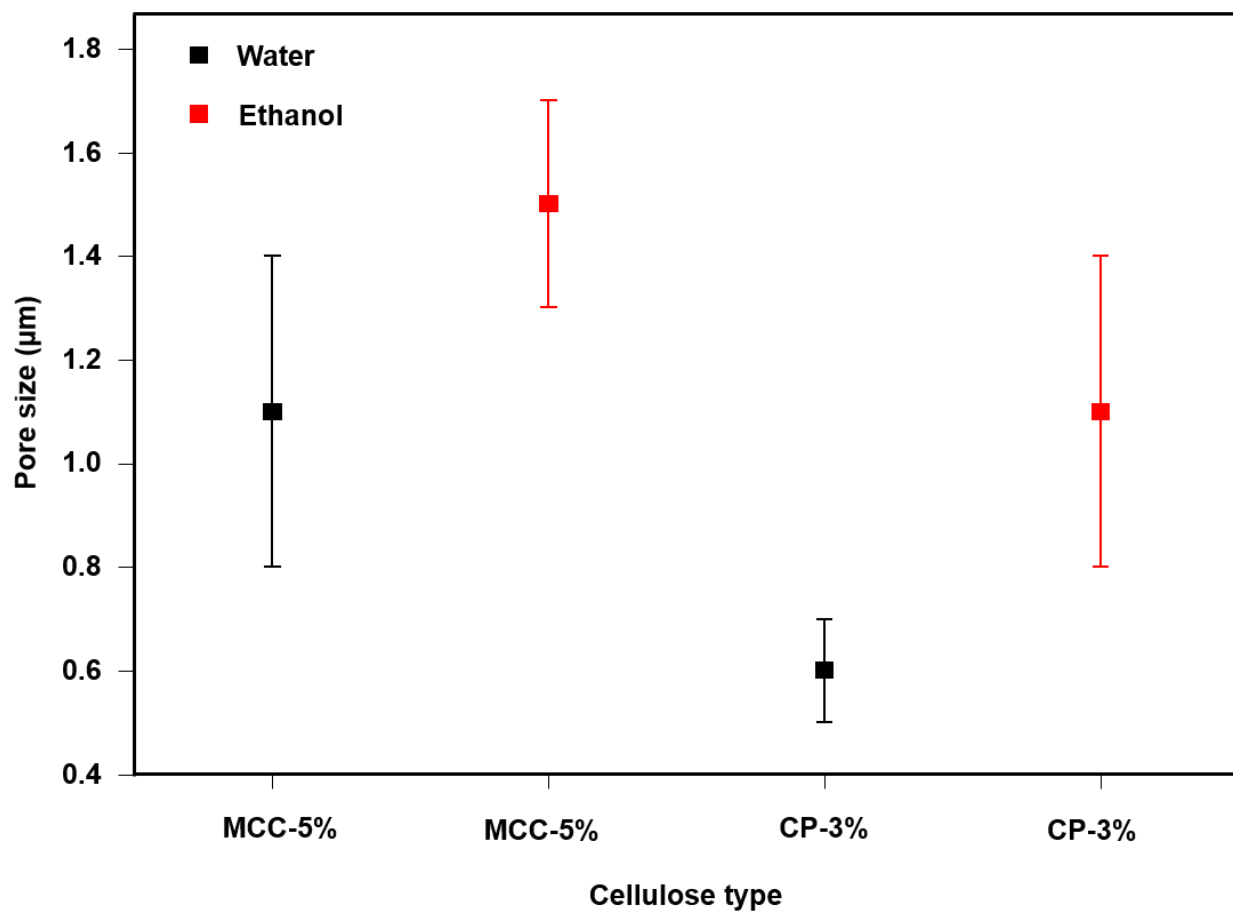

**Figure SI 12:** Effect of cellulose type and coagulating solvent on the pore size of cellulose aerogel using DBU as a super base.



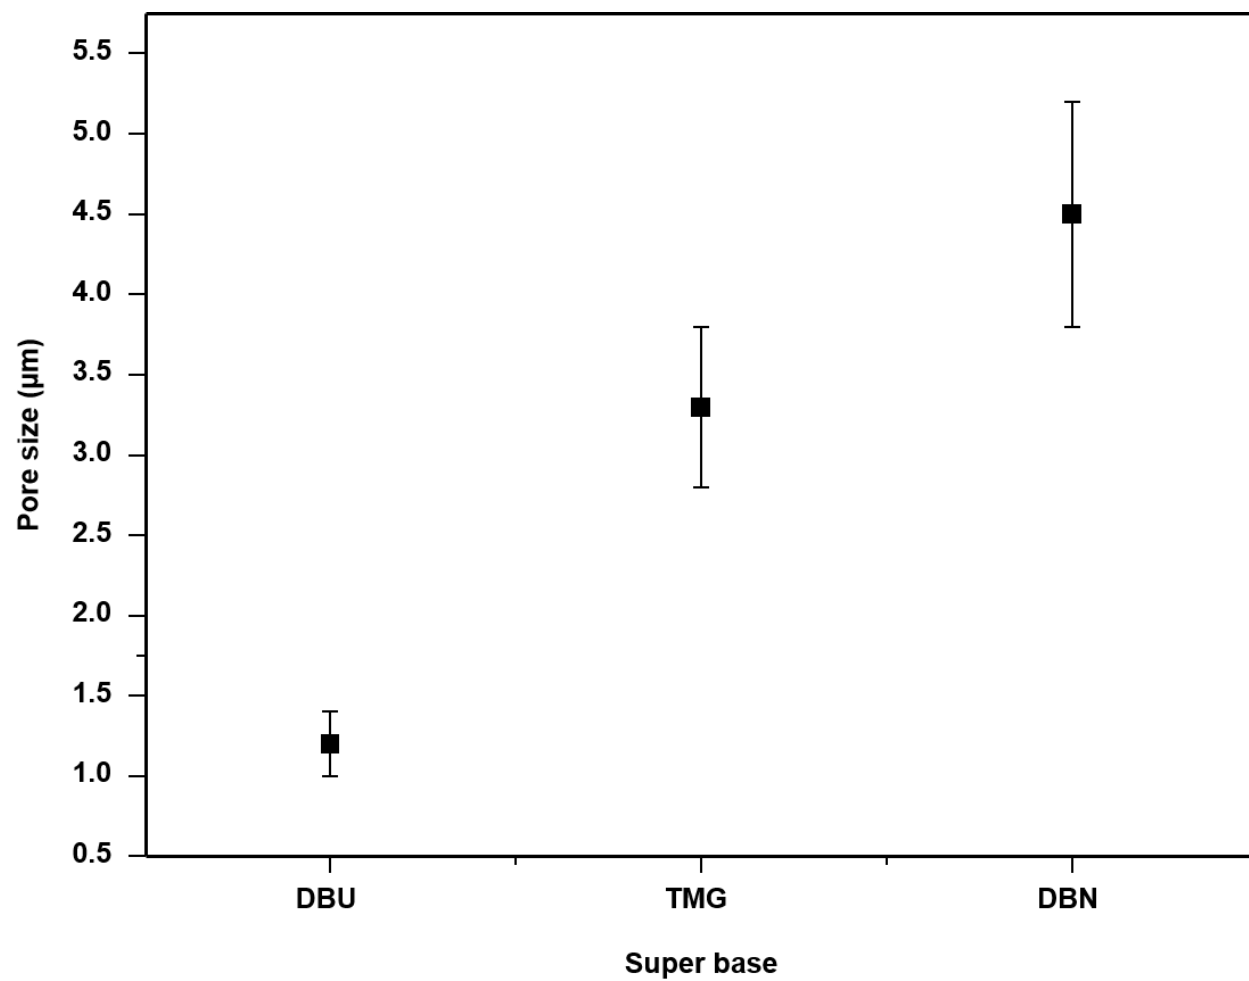

**Figure SI 13:** Effect of the super base on the porosity of cellulose aerogel using 5 wt.% MCC and methanol coagulation.

#### IV. FT-IR spectra comparison between native MCC and cellulose aerogel

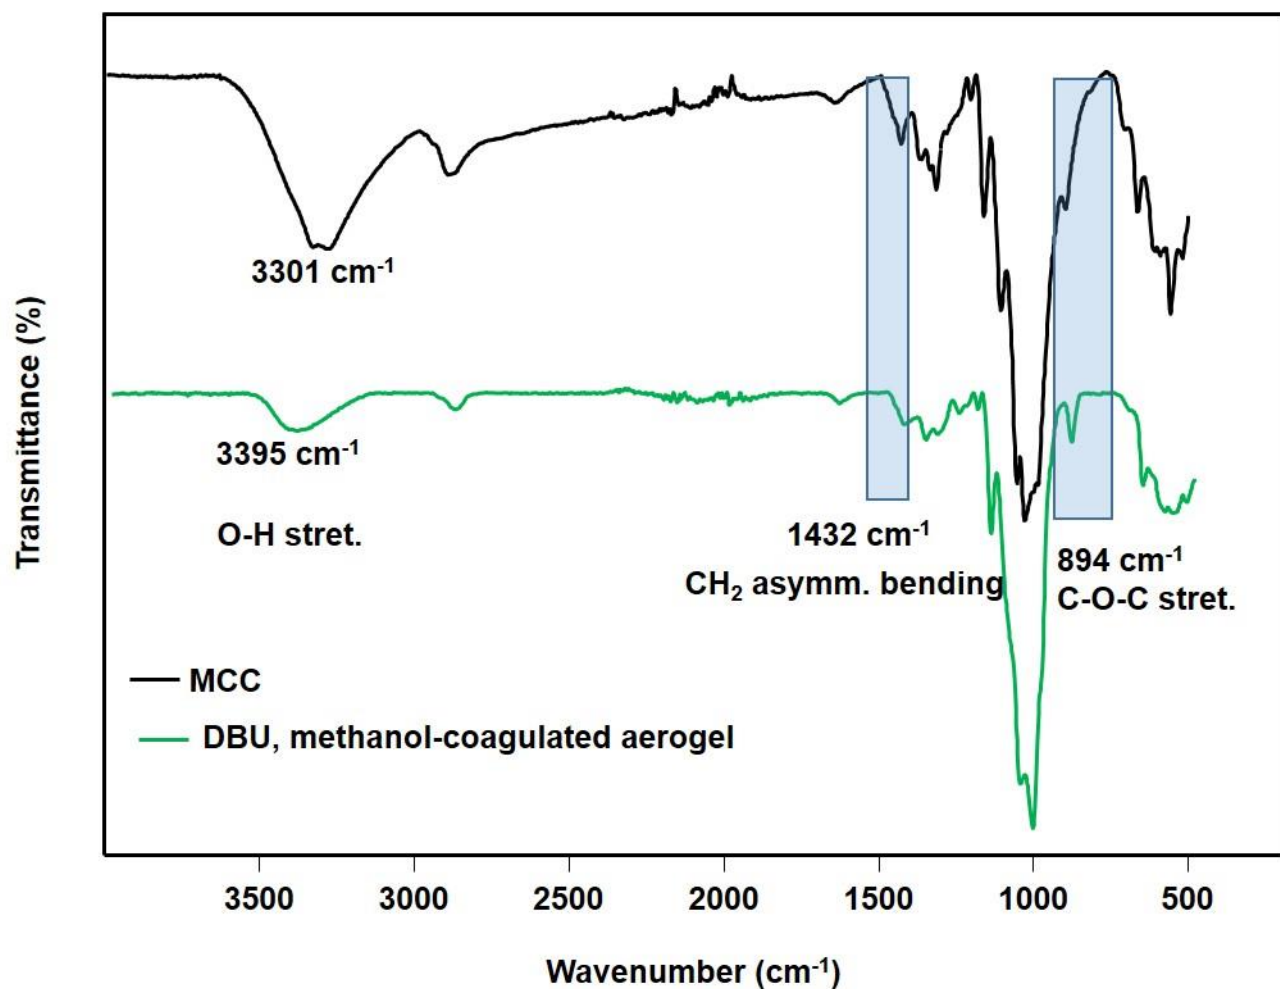

**Figure SI 14:** FT-IR spectra comparison between MCC and cellulose aerogel from freeze-drying (using 5 wt.% MCC, DBU as super base and methanol coagulation).

V. FT-IR spectra comparison between pure and recovered DBU and DMSO

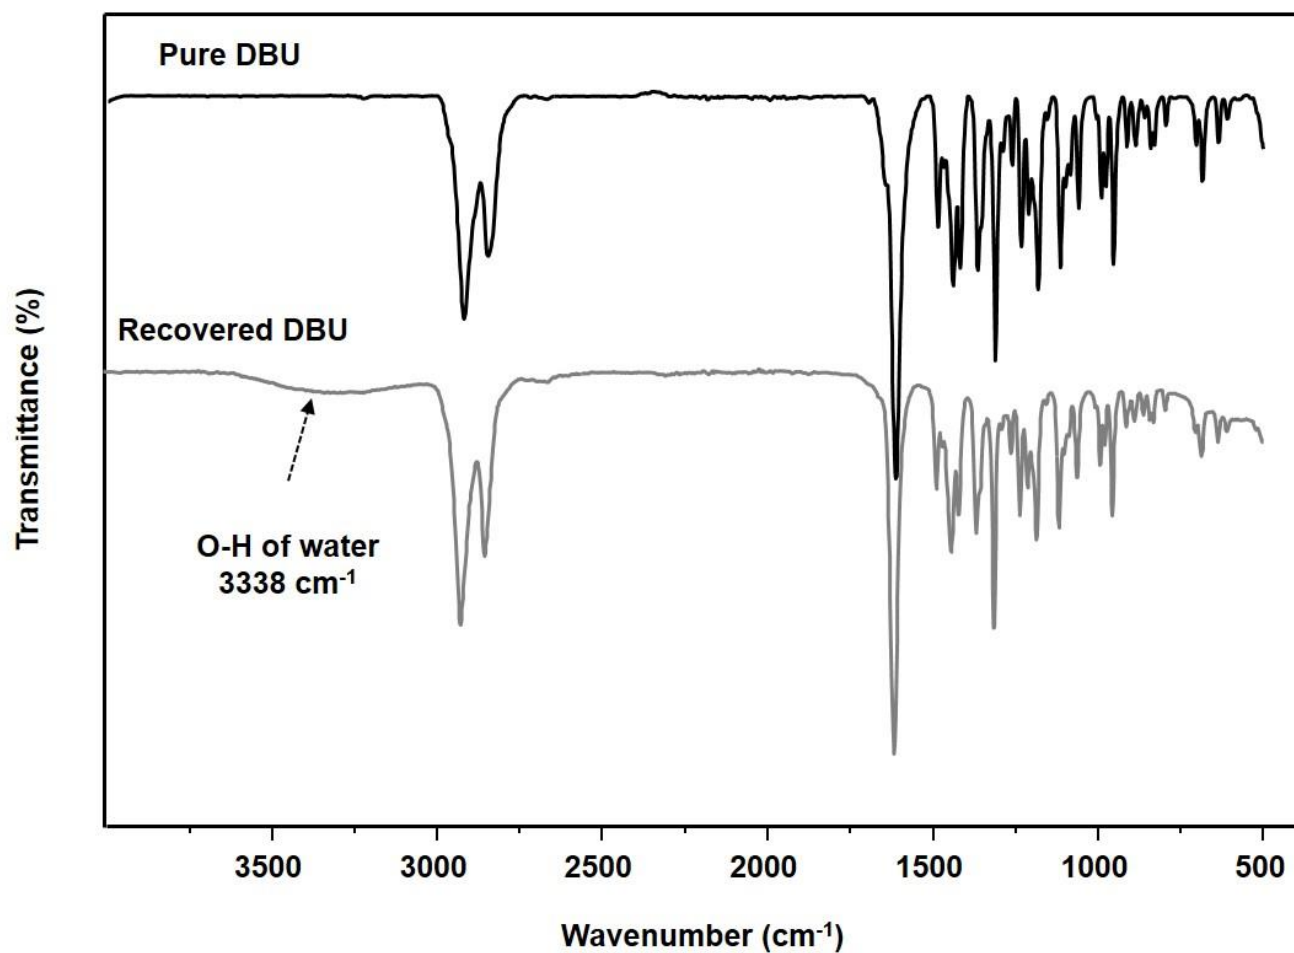

**Figure SI 15:** FT-IR spectra comparison between pure and recovered DBU (using 5 wt.% MCC, DBU as super base and methanol coagulation).

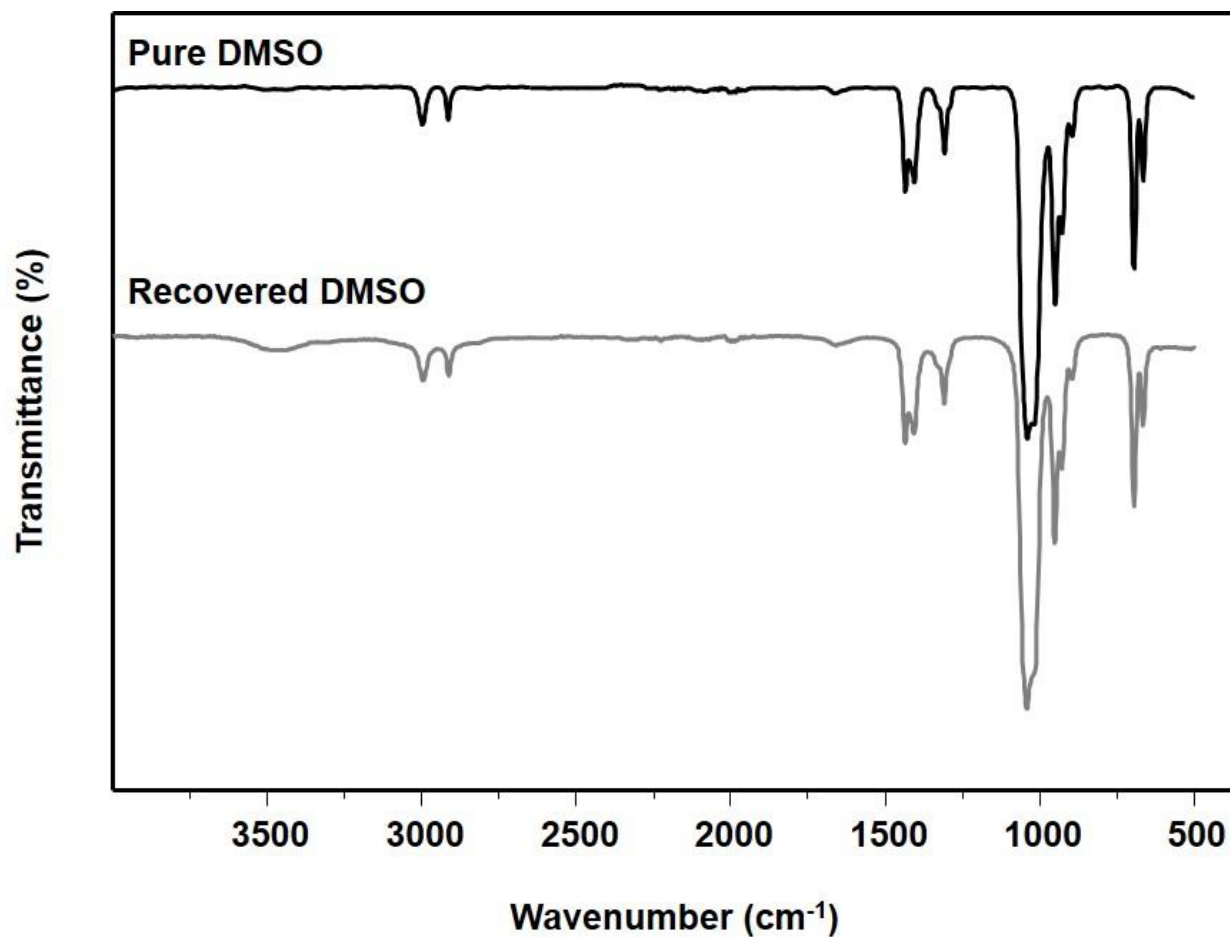

**Figure SI 16:** FT-IR spectra comparison between pure and recovered DMSO (using 5 wt.% MCC, DBU as super base and methanol coagulation).
